# Supplementary material for: Enhancing catalytic activity and stability for CO2 methanation on Ni@MOF-5 via control of active species dispersion
Source: Royal Society of Chemistry journal article supplement (doi:10.1039/c4cc08733j), 2014-12-06
Supplement: c4cc08733j1.pdf [file c4cc08733j1.pdf]

## Electronic Supplementary Information

### Enhancing catalytic activity and stability for CO<sub>2</sub> methanation on Ni@MOF-5 *via* controlling active species dispersion

Wenlong Zhen <sup>a,b</sup>, Bo Li <sup>a,b</sup>, Gongxuan Lu <sup>b,\*</sup>, Jiantai Ma <sup>a</sup>

<sup>a</sup> State Key Laboratory of Applied Organic Chemistry, College of Chemistry and Chemical Engineering, Lanzhou University, Lanzhou, China. E-mail: zhenwenlong123@126.com; Tel: +86 931 4968062

<sup>b</sup> State Key Laboratory for Oxo Synthesis and Selective Oxidation, Lanzhou Institute of Chemical Physics, Chinese Academy of Sciences, Lanzhou 730000, P. R. China.

## Experimental section

### 1. Materials

Zinc nitrate hexahydrate ( $\text{Zn}(\text{NO}_3)_2 \cdot 6\text{H}_2\text{O}$ , AR, Xilong Chemical Co., Ltd.), Nickel(II) acetylacetonate ( $\text{Ni}(\text{acac})_2$ , AR, J&K Scientific Ltd.), N,N-dimethylformamide (DMF, 99.5%, Xilong Chemical Co., Ltd.), terephthalic acid ( $\text{H}_2\text{BDC}$ ,  $\geq 99.0\%$ , Shanghai KEFENG Chemical Reagent Co., Ltd.), acetone (AR, Xilong Chemical Co., Ltd.), hydrazine solution ( $\text{N}_2\text{H}_4 \cdot \text{H}_2\text{O}$ , AR, Tianjin NO.2 Reagent Co. Ltd), silica ( $\text{SiO}_2$ , 40 mesh, Shanghai Meryer Chemical Technology Co., Ltd), ethanol ( $\text{C}_2\text{H}_5\text{OH}$ , AR, Xilong Chemical Co., Ltd.) were used.

### 2. Catalysts preparation

#### 2.1 Synthesis of MOF-5.

MOF-5 was synthesized by the solvent-thermal route according to the previous literature <sup>S1</sup>. In a glass reactor equipped with a reflux condenser and a teflon-lined stirrer, 1.025 g of  $\text{H}_2\text{BDC}$  and 4.825 g of  $\text{Zn}(\text{NO}_3)_2 \cdot 6\text{H}_2\text{O}$  were dissolved in 148.9 mL of DMF and heated up to  $130^\circ\text{C}$  for 4 h. After about 45 min, crystallization started and the formerly clear solution turned slightly opaque. After 4 h, the reaction product was cooled down to room temperature. The solid was filtered off, washed three times with 100 mL of dry acetone and dried under a stream of nitrogen. Finally, as-synthesized MOF-5 was calcinated in  $\text{N}_2$  flow at  $250^\circ\text{C}$  for 6 h to remove the guest molecules from the pores.

#### 2.2 Synthesis of x(wt%)Ni@MOF-5.

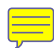

A series of  $x(x=5, 7.5, 10, 12.5)$ Ni@MOF-5 catalysts was prepared by impregnation methods using  $\text{Ni}(\text{acac})_2$  and MOF-5.  $\text{Ni}(\text{acac})_2$  (0.875 g) was dissolved in ethanol (150.0 mL) to form a dark green solution at 60 °C. Subsequently, guest-free MOF-5 (1.8 g) was added into the solution under continuous agitation. The mixture was stirred for 16 h in air, and 5.00 mL of hydrazine solution (80 wt%) was added into the aqueous dispersions. The mixture was maintained at this temperature for 8 h until the color of the solution changed into dark. After complete reduction, the obtained dispersions were filtered, washed with water several times to remove the impurities. Finally, the obtained wet solids were dried at 110 °C for 12 h and calcined at 250 °C for 5 h under inert atmosphere ( $\text{N}_2$ ). This synthesized Ni@MOF-5 catalyst was denoted as 10Ni@MOF-5.

### 2.3 Synthesis of 10Ni/SiO<sub>2</sub>.

The catalyst 10(wt%)Ni/SiO<sub>2</sub> was prepared by similar impregnation method.  $\text{Ni}(\text{acac})_2$  (0.875 g) was dissolved in ethanol (150.0 mL) to form a dark green solution at 60 °C. Subsequently, SiO<sub>2</sub> (1.8 g) was added into the solution under continuous agitation. The mixture was stirred for 16 h in air. Subsequently, 5.0 mL of hydrazine solution (80 wt%) was added into the aqueous dispersions. The mixture was maintained at this temperature for 8 h until the color of the solution changed into dark. After complete reduction, the obtained dispersions were filtered, washed with water several times to remove the impurities. Finally, the obtained wet solids were dried at 110 °C for 12 h and calcined at 450 °C for 5 h under inert atmosphere ( $\text{N}_2$ ). The Ni/SiO<sub>2</sub> catalyst was denoted as 10Ni/SiO<sub>2</sub>.

### 3. Catalytic activity

Catalytic performances tests were conducted at atmospheric pressure in a fixed-bed continuous flow quartz reactor in the temperature range from 180 to 320°C over 200mg catalyst. The reactor was heated in a tube furnace equipped with a temperature controller. All gases were monitored by calibrated mass flow controllers.

The H<sub>2</sub> and CO<sub>2</sub> reactant with a ratio of 4:1 was used and N<sub>2</sub> was added as a carrier gas and internal standard for gas analysis. They were introduced into the reactor at a molar ratio of H<sub>2</sub>:CO<sub>2</sub>:N<sub>2</sub>=12:3:10 and the total flow rate were set to 25 mL·min<sup>-1</sup>. The gas hourly space velocity (GHSV) was 2000h<sup>-1</sup>. The gas phase products were analyzed on two on-line chromatographs equipped with thermal-conductivity detectors (TCD). Hydrocarbons as well as oxygenated products were separated with a GC112A (SDPTOP, Shanghai in China; column: HP-5, 30m×0.53mm×0.5μm) and analyzed by means of a flame ionization detector (FID). The detection limit for the products was 1×10<sup>-2</sup>vol. % at the given conditions. CO<sub>2</sub> conversion, CH<sub>4</sub> yield, CH<sub>4</sub> and CO selectivity were defined as follows:

$$X_{\text{CO}_2}(\%) = \left(1 - \frac{\text{CO}_2 \times (\text{N}_2)_{\text{in}}}{\text{N}_2 \times (\text{CO}_2)_{\text{in}}}\right) \times 100$$
$$S_{\text{CH}_4}(\%) = \frac{\text{CH}_4}{\text{CO}_2 + \text{CH}_4 + \text{CO} + 2\text{C}_2\text{H}_6} \times 100$$
$$S_{\text{CO}}(\%) = \frac{\text{CO}}{\text{CO}_2 + \text{CH}_4 + \text{CO} + 2\text{C}_2\text{H}_6} \times 100$$

Where X is the conversion, S is the selectivity, P and (P)<sub>in</sub> are the reactant/product molar quantities at the exit and at the entrance of the reactor, respectively.

### 4. Characterization of the catalysts

Temperature-programmed reduction analysis (H<sub>2</sub>-TPR) was carried out by heating

a sample (50mg) from 25 to 700°C at 10°C min<sup>-1</sup> in a flow of 5 vol% H<sub>2</sub>/Ar mixture (40 mL min<sup>-1</sup>). The amount of H<sub>2</sub> consumed was measured by a TCD. The X-ray diffraction patterns (XRD) of the samples were recorded on a Rigaku B/Max-RB X-ray diffractometer with a nickel-filtrated Cu K $\alpha$  radiation over a 2 $\theta$  range of 15-85° and a position sensitive detector using a step size of 0.017° and a step time of 15s at 40 mA and 40 kV. X-ray photoelectron spectroscopy (XPS) analysis was performed using a VG Scientific ESCALAB 250Xi-XPS photoelectron spectrometer with an Al K $\alpha$  X-ray resource. The binding energies were calibrated by the C1s binding energy of 284.7 eV. The specific surface areas (SSA) of the catalysts were determined by N<sub>2</sub> adsorption-desorption measurements at 77 K by employing the Brunauer-Emmet-Teller (BET) method (Micromeritics apparatus ASAP 2020M). Transmission electron microscopy (TEM) and HRTEM images were taken with a Tecnai-G2-F30 field emission transmission electron microscope operating at accelerating voltage of 300 kV. To understand the calcination process, the samples (before calcination) were measured by thermogravimetric and differential scanning calorimetry (TG-DSC) analysis using NETZSCH STA 449F3 instrument. Fourier transform infrared (FT-IR) spectra were performed on a Nicolet Nexus 870 with the wave number from 4000 to 400 cm<sup>-1</sup>. The dispersion was measured by H<sub>2</sub> chemisorption using a Micromeritics Chemisorb 2750 Pulse Chemisorption System at 25°C.

**Table S1** Structural parameters obtained from N<sub>2</sub> adsorption isotherms analysis

| Samples               | $S_{\text{BET}}$ (m <sup>2</sup> /g) <sup>a</sup> | pore volume (cm <sup>3</sup> /g) <sup>b</sup> | Ni concentration (wt%) <sup>c</sup> | Ni dispersion (%) <sup>d</sup> |
|-----------------------|---------------------------------------------------|-----------------------------------------------|-------------------------------------|--------------------------------|
| 10Ni@MOF-5            | 2961                                              | 1.037                                         | 9.73                                | 41.8                           |
| MOF-5                 | 2973                                              | 1.182                                         | 0                                   | 0                              |
| 10Ni/SiO <sub>2</sub> | 155.6                                             | 0.8245                                        | 9.69                                | 33.7                           |

<sup>a</sup> Obtained from BET method.

<sup>b</sup> Total pore volume taken from the nitrogen adsorption volume at a relative pressure ( $P/P_0$ ) of 0.99.

<sup>c</sup> The data obtained from XPS.

<sup>d</sup> Measured by H<sub>2</sub> chemisorption at 25°C.

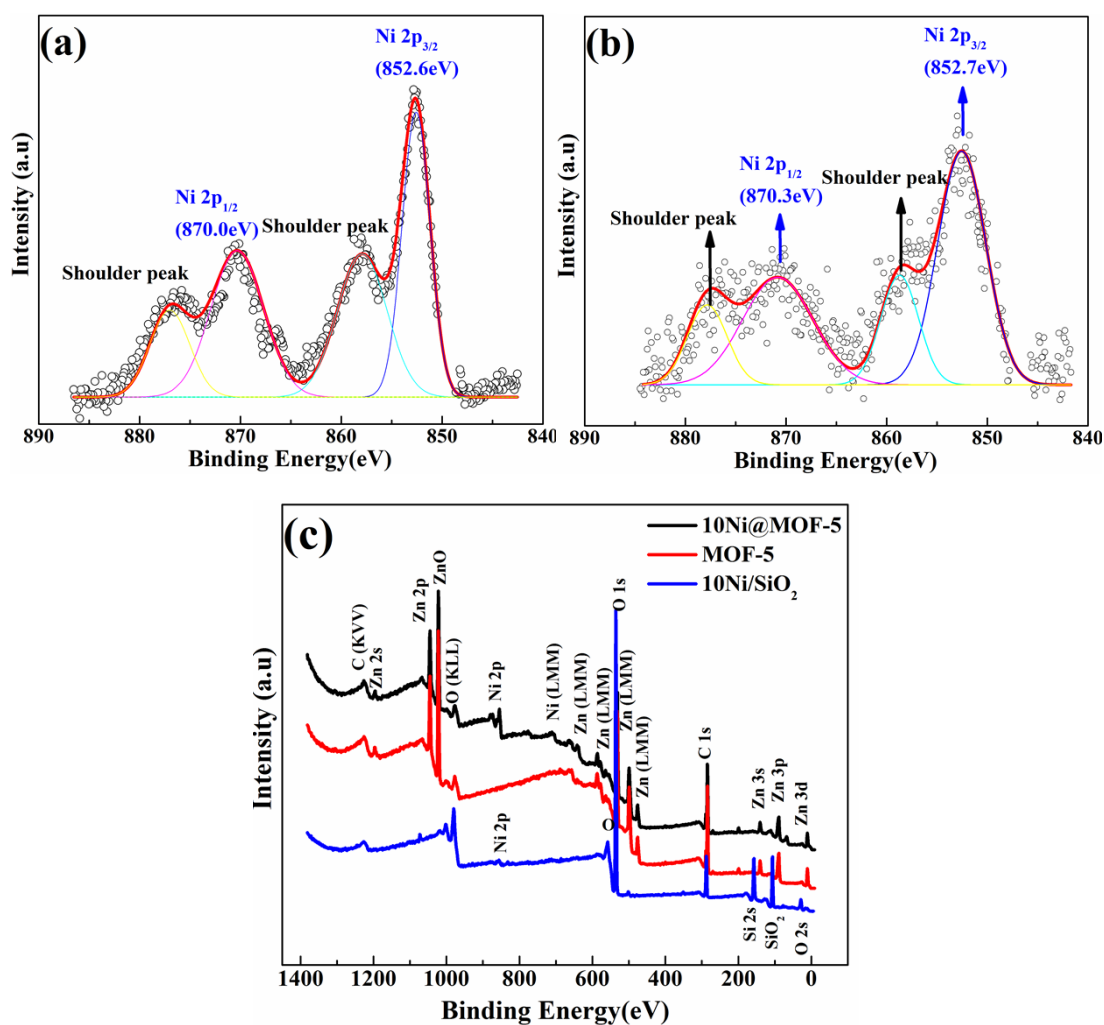

**Fig. S1** Ni2p XPS spectra for (a) 10Ni@MOF-5 and (b) 10Ni/SiO<sub>2</sub>; (c) XPS survey spectra of MOF-5, 10Ni@MOF-5 and 10Ni/SiO<sub>2</sub>.

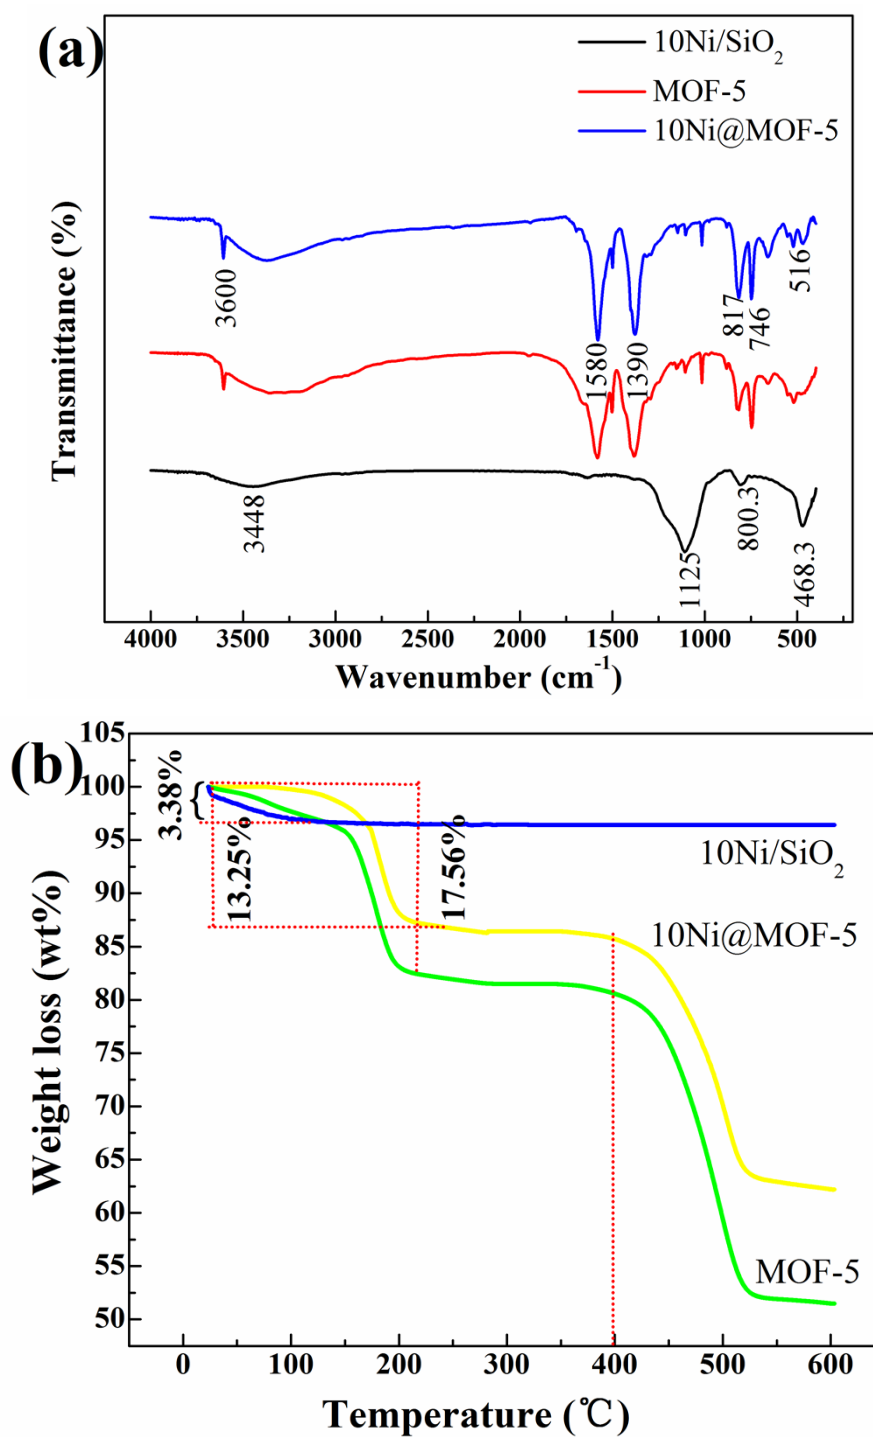

**Fig. S2** FT-IR spectra (a) and TGA plot (b) of the as-synthesized MOF-5, 10Ni@MOF-5 and 10Ni/SiO<sub>2</sub>.

## References

S1 U. Mueller, M. Schubert, F. Teich, H. Puetter, K. Schierle-Arndt and J. Pastré, *J. Mater. Chem.*, 2006, **16**, 626-636
